# Supplementary material for: Assessing storm surge model performance: what error indicators can measure the model's skill?
Source: Copernicus journal article supplement (doi:10.5194/os-20-1513-2024), 2024-11-25
Supplement: Supplementary file 1 [file os-20-1513-2024-supplement.pdf]

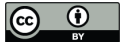

*Supplement of*

## **Assessing storm surge model performance: what error indicators can measure the model's skill?**

**Rodrigo Campos-Caba et al.**

*Correspondence to:* Rodrigo Campos-Caba ([rodrigo.camposcaba@unibo.it](mailto:rodrigo.camposcaba@unibo.it))

The copyright of individual parts of the supplement might differ from the article licence.

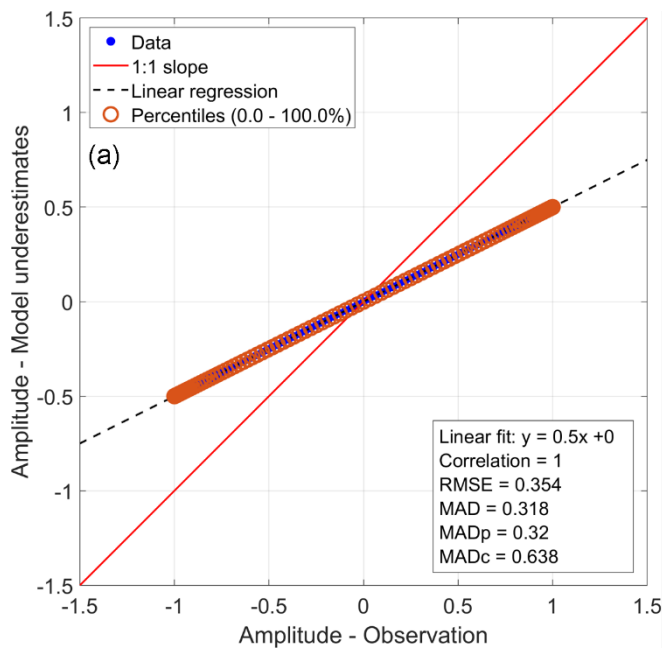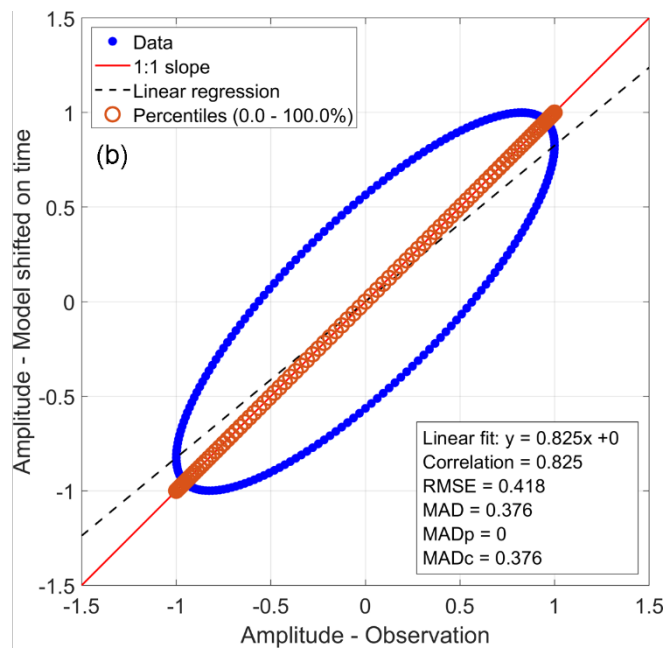

Figure S1: Scatter plots and metrics for the validation of the proposed metrics, MAD<sub>p</sub> and MAD<sub>c</sub>. (a) Observation vs model with half amplitude and same phase; (b) Observation vs model with same amplitude and phase shifted.

5

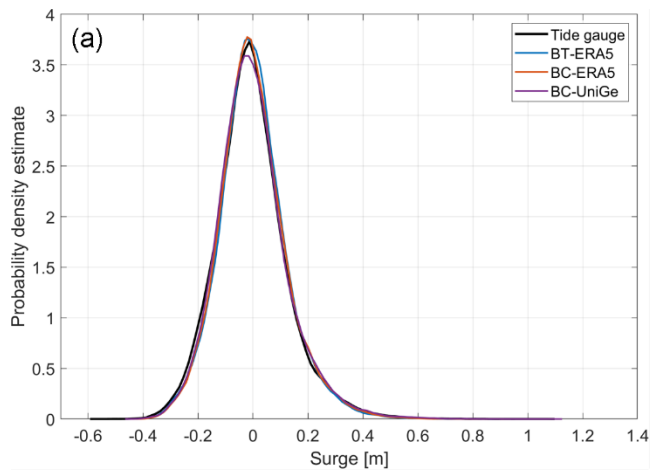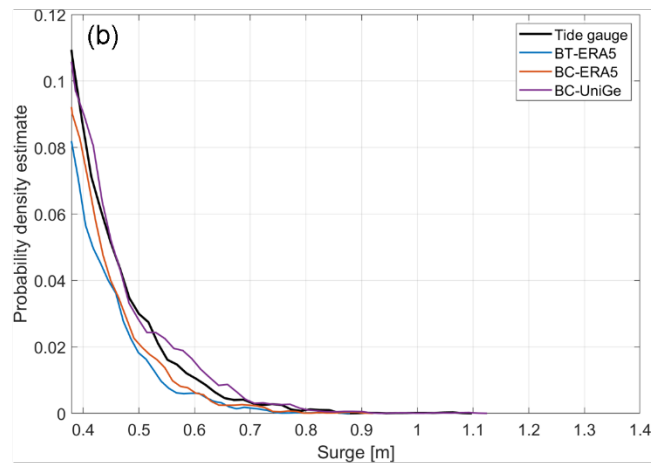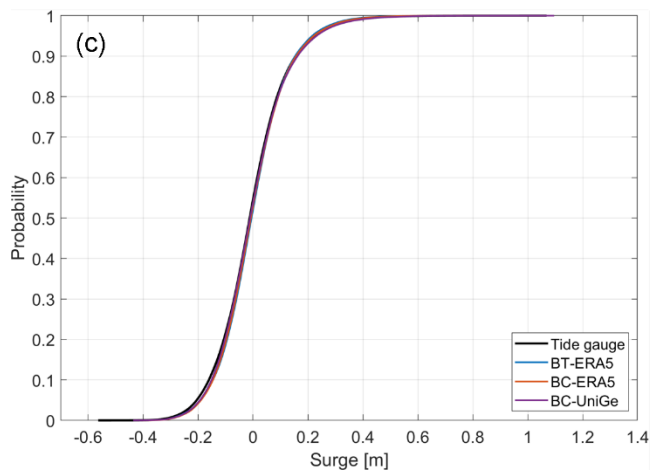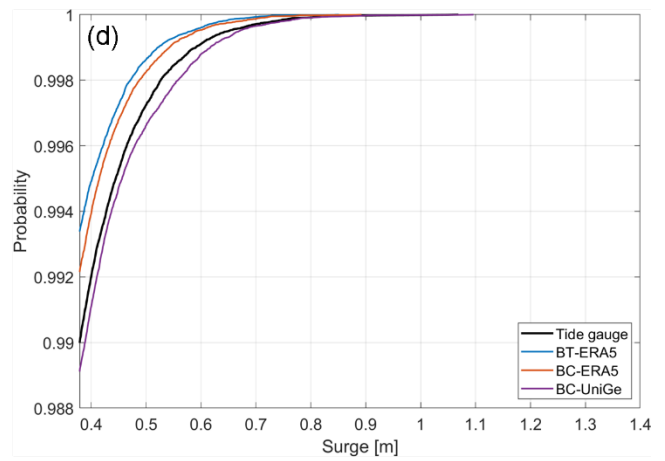

10 **Figure S2: Probability Density Estimates (PDE) and Empirical Cumulative Distribution Function (ECDF), CNR platform. (a) PDE for the total amount of data; (b) PDE for values above 99th percentile of the observed data; (c) ECDF for the total amount of data; (d) ECDF for values above the 99th percentile of the observed data.**

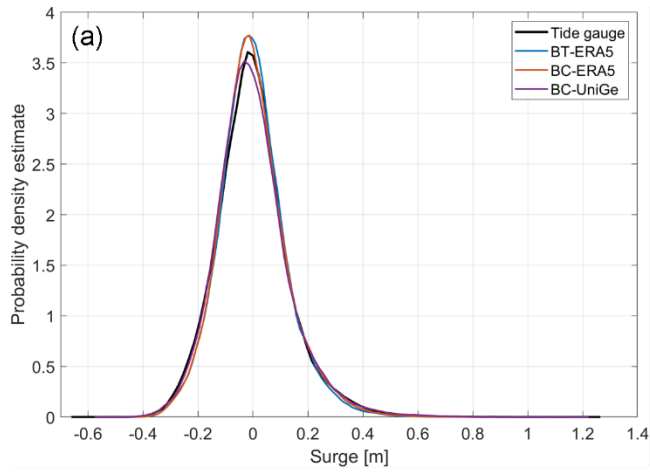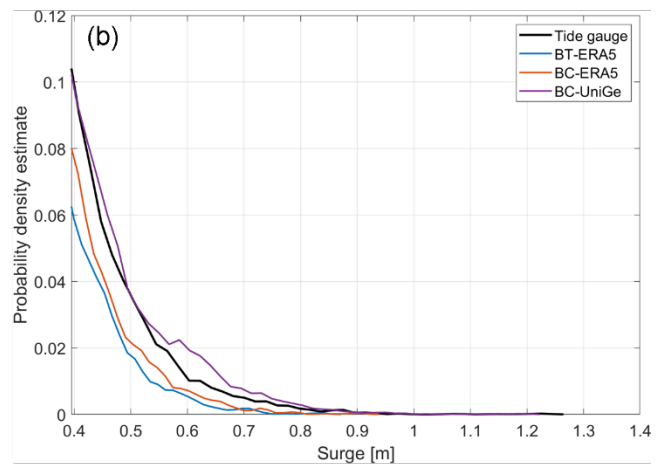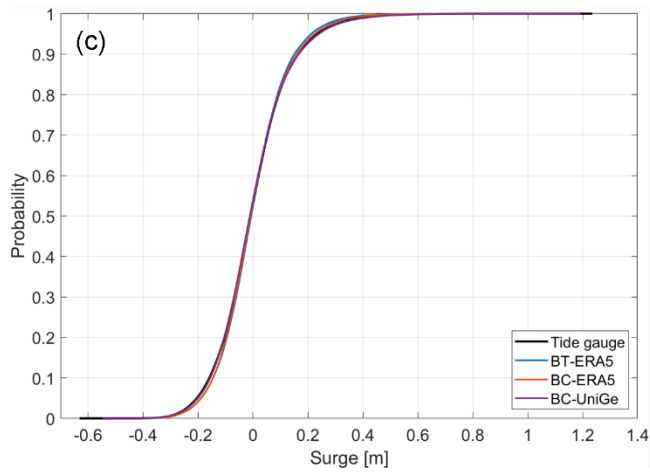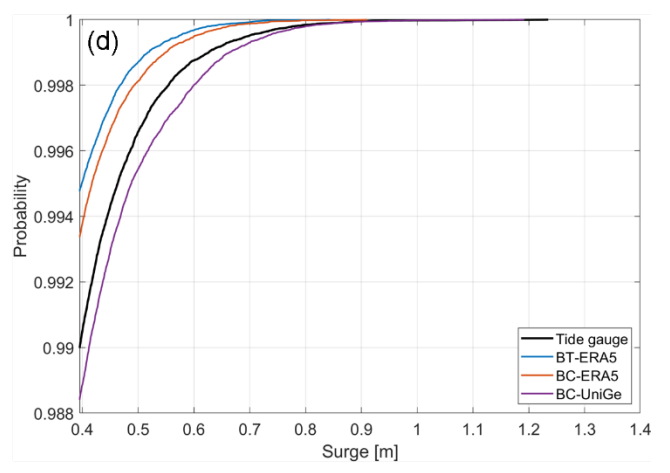

20

**Figure S3: Probability Density Estimates (PDE) and Empirical Cumulative Distribution Function (ECDF), Punta della Salute. (a) PDE for the total amount of data; (b) PDE for values above 99th percentile of the observed data; (c) ECDF for the total amount of data; (d) ECDF for values above the 99th percentile of the observed data.**

25

30

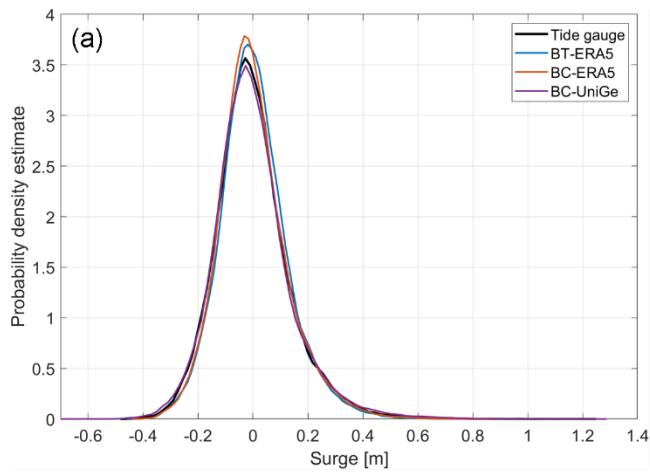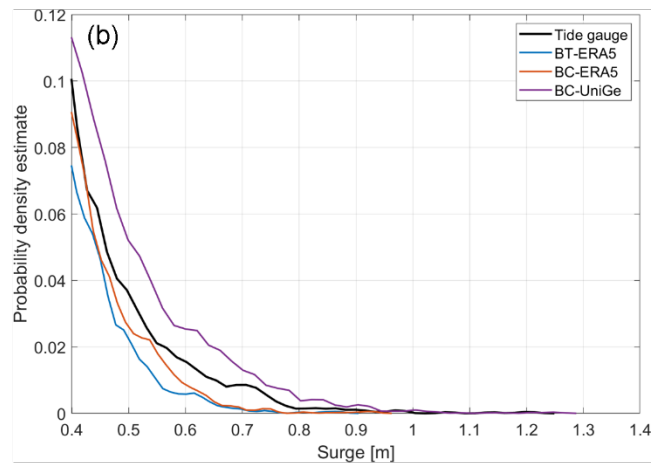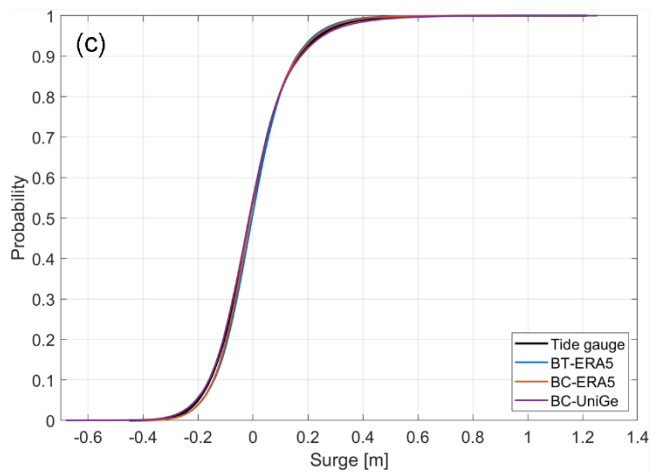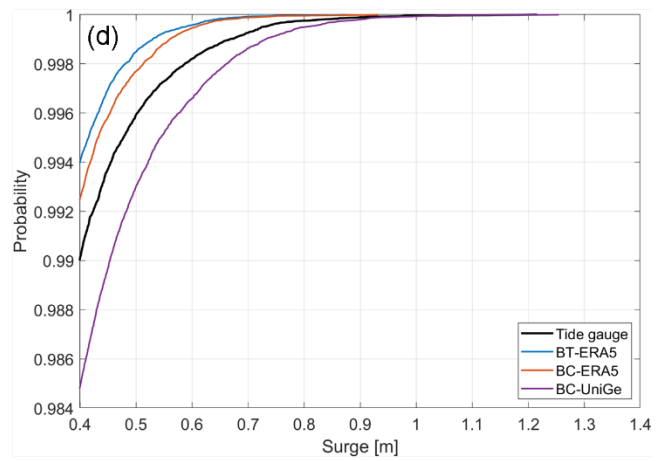

35 **Figure S4: Probability Density Estimates (PDE) and Empirical Cumulative Distribution Function (ECDF), Caorle. (a) PDE for the total amount of data; (b) PDE for values above 99th percentile of the observed data; (c) ECDF for the total amount of data; (d) ECDF for values above the 99th percentile of the observed data.**

40

45

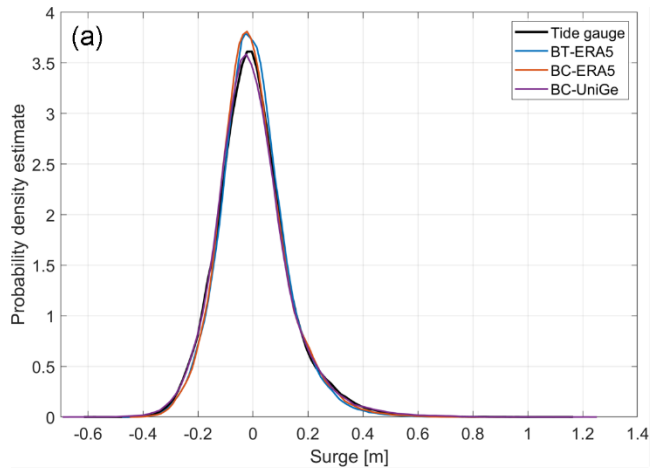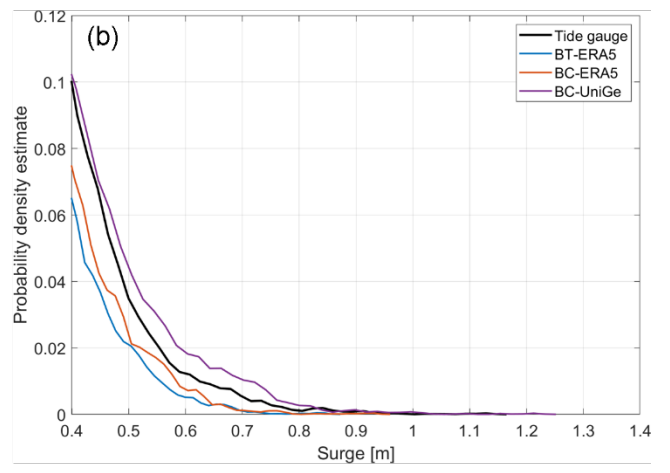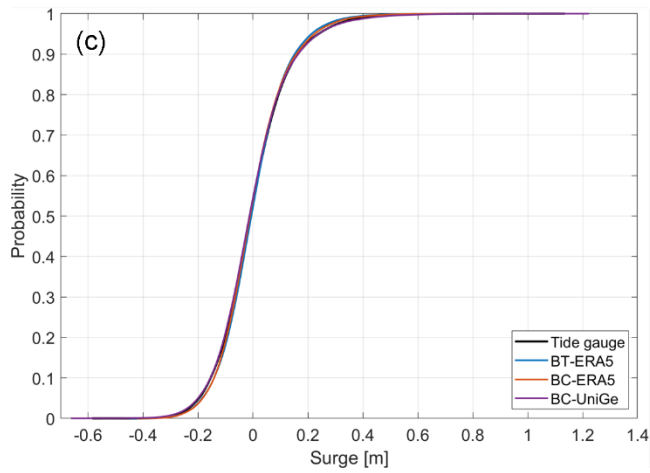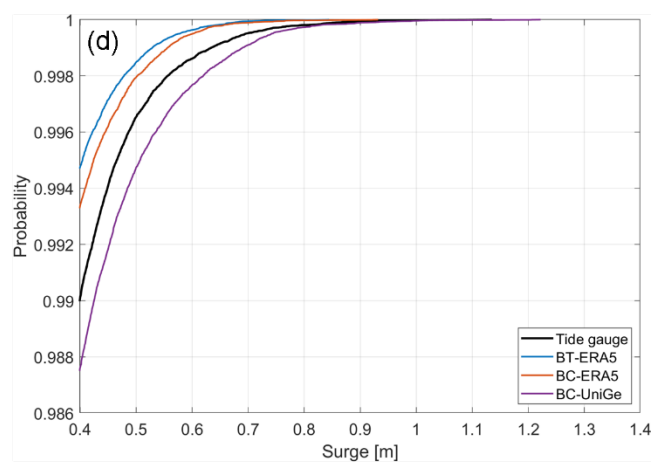

50 **Figure S5: Probability Density Estimates (PDE) and Empirical Cumulative Distribution Function (ECDF), Grado. (a) PDE for the total amount of data; (b) PDE for values above 99th percentile of the observed data; (c) ECDF for the total amount of data; (d) ECDF for values above the 99th percentile of the observed data.**

55

60

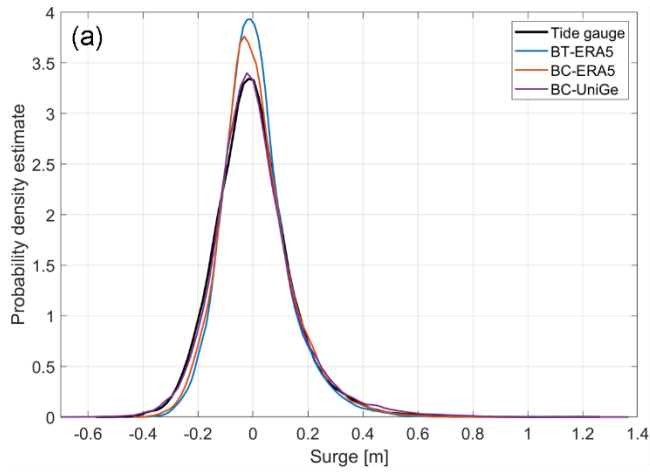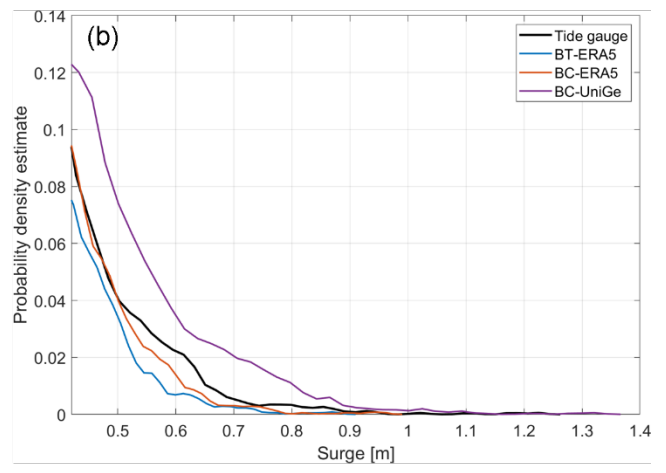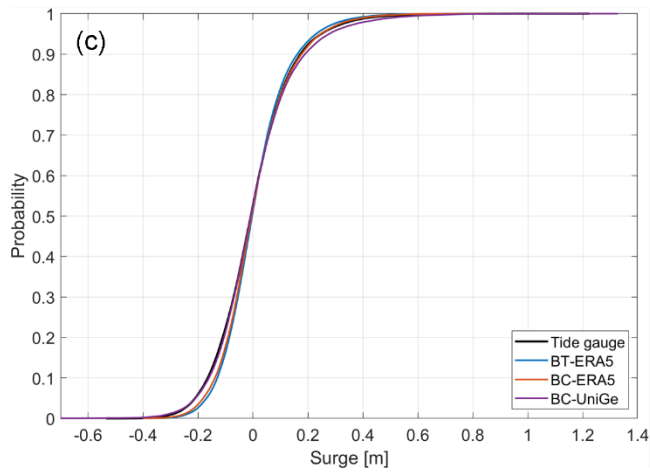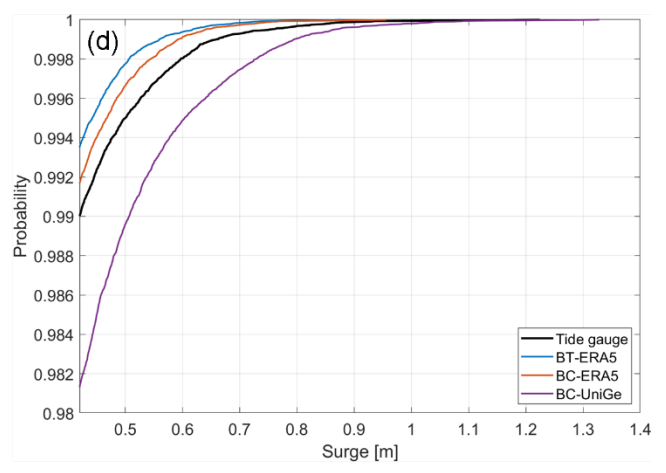

**Figure S6: Probability Density Estimates (PDE) and Empirical Cumulative Distribution Function (ECDF), Monfalcone. (a) PDE for the total amount of data; (b) PDE for values above 99th percentile of the observed data; (c) ECDF for the total amount of data; (d) ECDF for values above the 99th percentile of the observed data.**

65

70

75

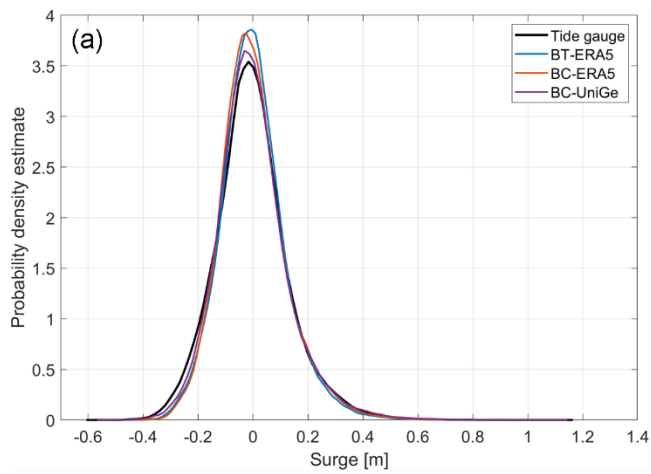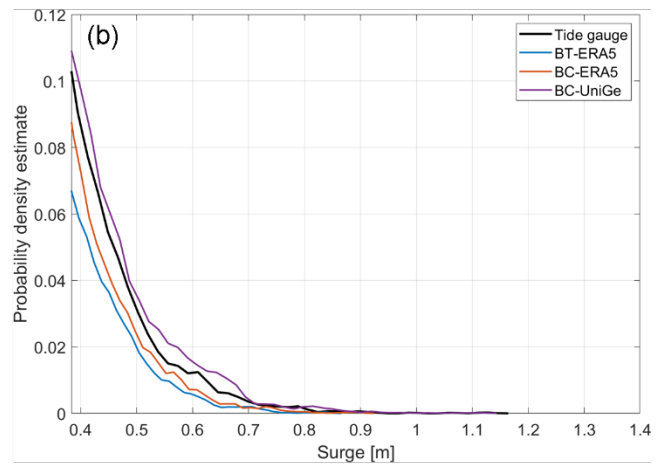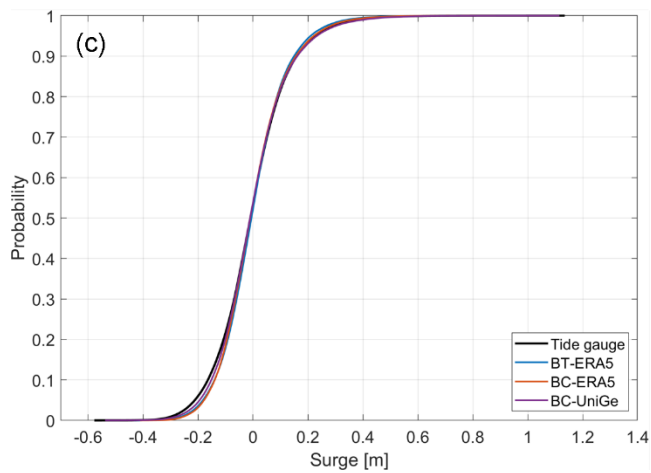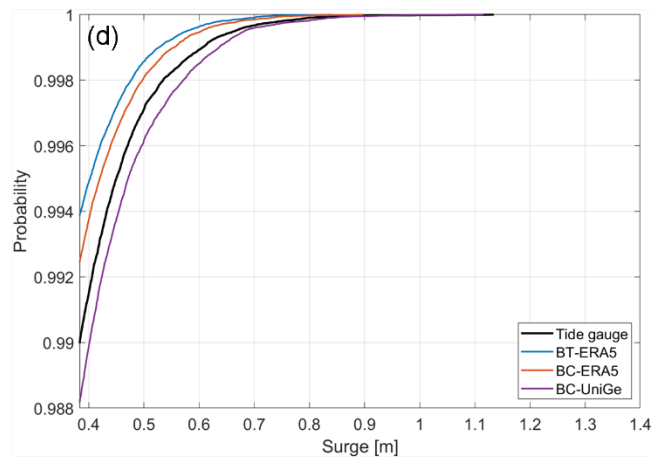

**Figure S7: Probability Density Estimates (PDE) and Empirical Cumulative Distribution Function (ECDF), Trieste. (a) PDE for the total amount of data; (b) PDE for values above 99th percentile of the observed data; (c) ECDF for the total amount of data; (d) ECDF for values above the 99th percentile of the observed data.**
